# Supplementary material for: Features of Functionalization of the Surface of Alumina Nanofibers by Hydrolysis of Organosilanes on Surface Hydroxyl Groups
Source: MDPI journal article supplement (doi:10.3390/polym13244374), 2021-12-14
Supplement: s1 [file s1]

Supplementary materials

# Features of Functionalization of the Surface of Alumina Nanofibers by Hydrolysis of Organosilanes on Surface Hydroxyl Groups

M. M. Simunin <sup>1,2,3\*</sup>, A. S. Voronin <sup>2,3,4</sup>, Yu. V. Fadeev <sup>2,3</sup>, Yu. L. Mikhlin <sup>5</sup>, D. A. Lizunov <sup>3</sup>, A. S. Samoilo <sup>2</sup>, D. Yu. Chirkov <sup>1,3</sup>, S. Yu. Voronina <sup>1</sup> and S. V. Khartov <sup>3</sup>

<sup>1</sup> Reshetnev Siberian State University of Science and Technology, Krasnoyarsk 660037, Russia; chirkov@5d-group.su (D.Y.C.); simkina\_svetlana@mail.ru (S.Y.V.)

<sup>2</sup> Siberian Federal University, Krasnoyarsk 660041, Russia; a.voronin1988@mail.ru (A.S.V.); daf.hf@list.ru (Y.V.F.); x\_lab@rambler.ru (A.S.S.)

<sup>3</sup> Federal Research Center, Krasnoyarsk Science Center SB RAS, 660036, Russia; gipsynanotech@gmail.com (D.A.L.); khartov@5d-group.su (S.V.K.)

<sup>4</sup> Bauman Moscow State Technical University, 105005 Moscow, Russia

<sup>5</sup> Krasnoyarsk Science Center SB RAS, Institute of Chemistry and Chemical Technology, Krasnoyarsk 660036, Russia; yumikh@icct.ru

\* Correspondence: michanel@mail.ru; Tel.: +7-913-197-39-26

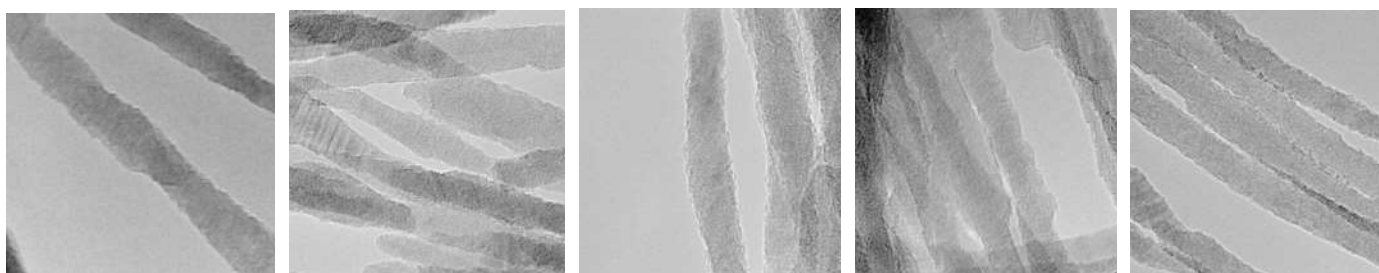

TEM of raw NFA

TEM VTMS-NFA

TEM MAMS-NFA

TEM GlyMS-NFA

TEM ABES-NFA

**Figure S1.** For TEM, alumina nanofibers were dispersed in 99.99% pure isopropanol by sonication for 5 minutes, after which the dispersion was applied to a carbon-coated gold grid and dried.
